# Supplementary material for: Preparation, characterization, and magnetic properties of poly(3-methoxythiophene)-Fe 3 O 4 conducting nanocomposite
Source: Royal Society of Chemistry journal article supplement (doi:10.1039/d5py00933b), 2026-01-01
Supplement: d5py00933b1.pdf [file d5py00933b1.pdf]

## Supplementary information

### Preparation, characterization, and magnetic properties of poly(3-methoxythiophene)-Fe<sub>3</sub>O<sub>4</sub> conducting nanocomposite

Katsuyoshi Hoshino,<sup>a\*</sup> Kiho Kashiwagi,<sup>a</sup> Minako Tachiki,<sup>a</sup> Hyuma Masu,<sup>b</sup> and Satoru Tsukada<sup>a\*</sup>

<sup>a</sup> Department of Materials Science, Graduate School of Engineering, Chiba University, 1-33 Yayoi-cho, Inage-ku, Chiba 263-8522, Japan

<sup>b</sup> Center for Analytical Instrumentation, Chiba University, 1-33 Yayoi-cho, Inage-ku, Chiba 263-8522, Japan

### Table of Contents

|                                                                |    |
|----------------------------------------------------------------|----|
| Elemental maps for P3MeOT-Cl                                   | S2 |
| EDX measurements of P3MeOT-ClO <sub>4</sub> and Red 2          | S3 |
| Magnetism demonstrations for P3MeOT-ClO <sub>4</sub> and Red 2 | S3 |
| XPS measurements for P3MeOT-ClO <sub>4</sub>                   | S4 |
| XPS survey spectra of P3MeOT-Cl and Red 1                      | S5 |
| EDX spectra of P3MeOT-Cl and Red 1                             | S5 |
| Magnetic property measurements for Red 2                       | S6 |
| Magnetic property measurements for P3MeOT-ClO <sub>4</sub>     | S7 |
| Supplementary References                                       | S8 |

### Elemental maps for P3MeOT-Cl

The results of the elemental mapping analysis of P3MeOT-Cl are shown in Fig. S1. The images exhibited minimal contrast for Fe (attributed to iron chloride) and C, O, and S (attributed to P3MeOT), suggesting a nearly uniform distribution of these elements throughout the sample. This observation corroborates the minimal contrast observed in the TEM images of P3MeOT-Cl.

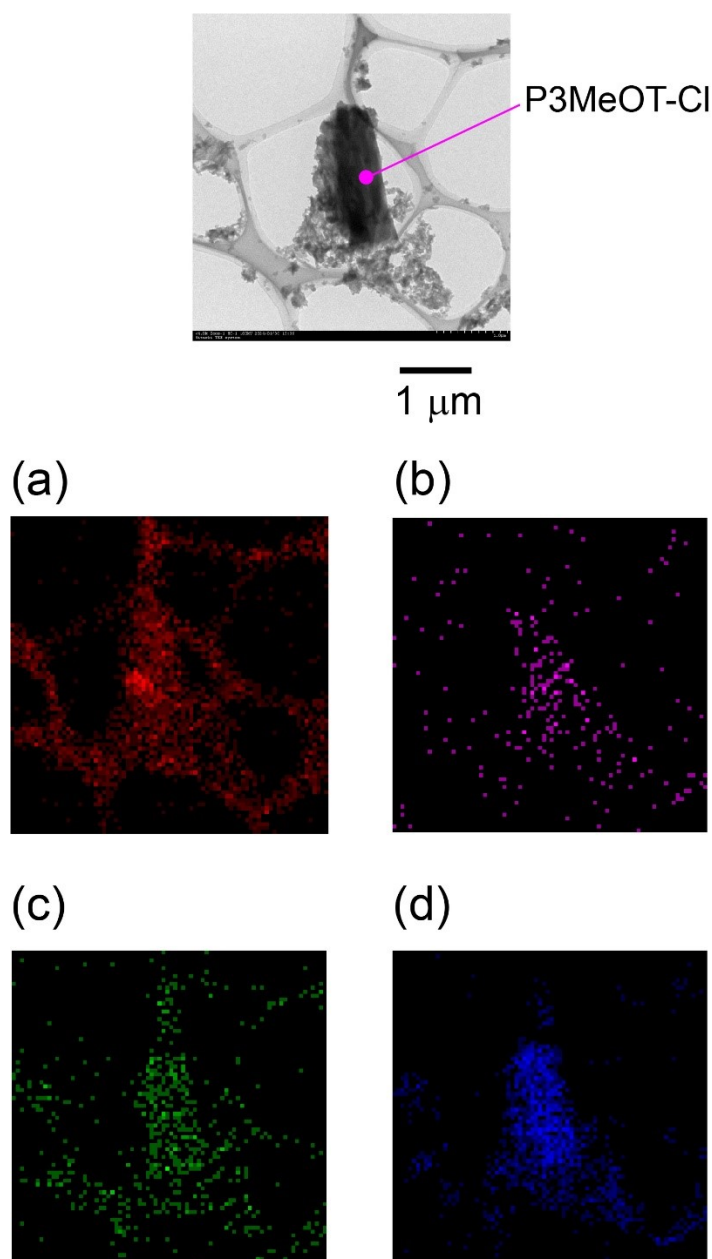

**Fig. S1** EDX elemental mapping images recorded for the (a) C, (b) Fe, (c) O, and (d) S components of P3MeOT-Cl. The mapping process was conducted using the TEM image presented at the top of each elemental map.

### EDX measurements of P3MeOT-ClO<sub>4</sub> and Red 2

The EDX elemental analysis results obtained for P3MeOT-ClO<sub>4</sub> and Red 2 are listed in Table S1, wherein the atomic ratios of S, Cl, and Fe are given. The atomic ratios of Cl and Fe were normalized to an atomic concentration of 1 for S. The Fe/S ratios were determined to be zero for both samples, indicating that neither P3MeOT-ClO<sub>4</sub> nor Red 2 contains any detectable amounts of Fe. In addition, the difference in the degree of polymerization between P3MeOT-Cl (the precursor of Red 1) and P3MeOT-ClO<sub>4</sub> (the precursor of Red 2) is small,<sup>1</sup> and so Red 2 can be regarded as a model compound that would be obtained if the Fe-containing product could be removed from Red 1.

**Table S1. Atomic ratios of Cl and Fe relative to S in the P3MeOT-ClO<sub>4</sub> and Red 2 molecules<sup>a</sup>**

| Molecule                | S    | Cl    | Fe   |
|-------------------------|------|-------|------|
| P3MeOT-ClO <sub>4</sub> | 1.00 | 0.27  | 0.00 |
| Red 2                   | 1.00 | 0.018 | 0.00 |

<sup>a</sup> The atomic ratios were obtained by EDX measurements and normalized to S

### Magnetism demonstrations for P3MeOT-ClO<sub>4</sub> and Red 2.

Fig. S2 shows photographic images of the P3MeOT-ClO<sub>4</sub> and Red 2 powders being brought close to a ferrite magnet through a glass vial. Since neither P3MeOT-ClO<sub>4</sub> nor Red 2 is attracted to the black circular magnet placed at the center of the blue plastic support, it can be concluded that they do not exhibit strong magnetism.

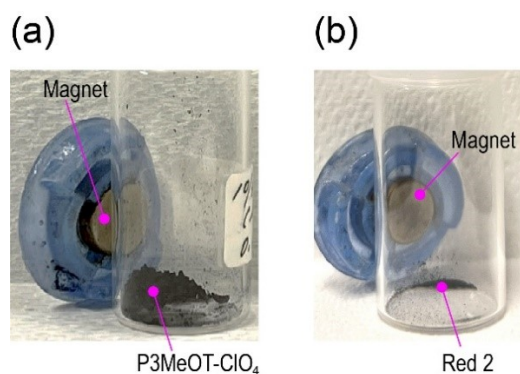

**Fig. S2** Photographic images showing the behaviors of the (a) P3MeOT-ClO<sub>4</sub> and (b) Red 2 powders when brought close to a magnet. The diameter of the glass vial is 20 mm.

### XPS measurements for P3MeOT- ClO<sub>4</sub>

Fig. S3 shows the XPS spectra recorded for the Fe 2p<sub>3/2</sub>, O 1s, and Cl 2p components of P3MeOT-ClO<sub>4</sub>. In the Fe 2p<sub>3/2</sub> spectrum, no signal is observed, indicating that Fe originating from the oxidizing agent, Fe(ClO<sub>4</sub>)<sub>3</sub>, is not present in the P3MeOT-ClO<sub>4</sub> structure. Additionally, the O 1s spectrum shows a peak centered at 531.7 eV, which was attributed to superposition of the signals originating from the methoxy oxygen moiety of P3MeOT and the ClO<sub>4</sub><sup>-</sup> dopant. In the Cl 2p spectrum, two peaks can be observed at 205.6 and 207.1 eV, which were attributed to the Cl 2p<sub>3/2</sub> and Cl 2p<sub>1/2</sub> components of Cl in ClO<sub>4</sub><sup>-</sup>. Compared with the values observed for Cl<sup>-</sup> (see Fig. 6 in the main text), these values are shifted toward higher binding energies. This shift was caused by a partial displacement of the chlorine valence electrons in ClO<sub>4</sub><sup>-</sup> toward the oxygen atoms. Consequently, this displacement strengthens the interactions between the Cl 2p electrons and the chlorine nucleus.

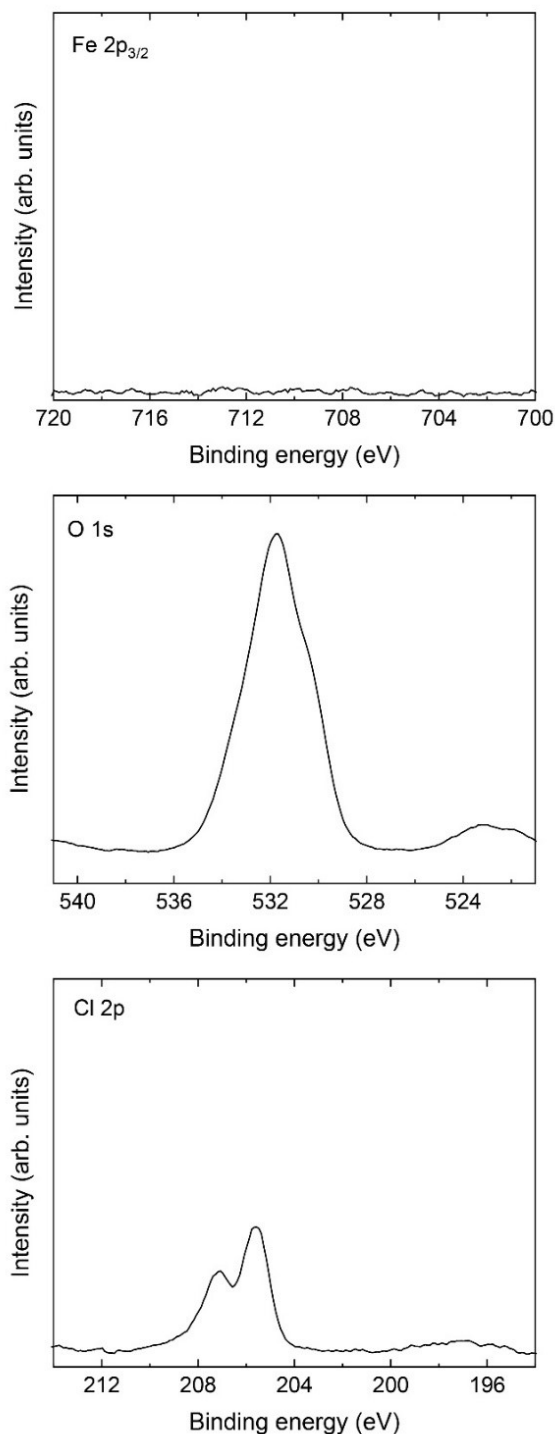

**Fig. S3** XPS spectra of the Fe 2p<sub>3/2</sub> (top), O1s (middle), and Cl 2p (bottom) components of P3MeOT-ClO<sub>4</sub>.

As a result, the binding energy of the Cl 2p electrons increases, leading to the observed shift in binding energy shown in Fig. S3.<sup>2</sup>

#### XPS survey spectra of P3MeOT-Cl and Red 1

Fig. S4 shows the XPS survey spectra recorded for P3MeOT-Cl and Red 1. As can be seen, no detectable amount of nitrogen was observed in the N 1s binding energy region around 400 eV, indicating that neither P3MeOT-Cl nor Red 1 contain nitrogen.

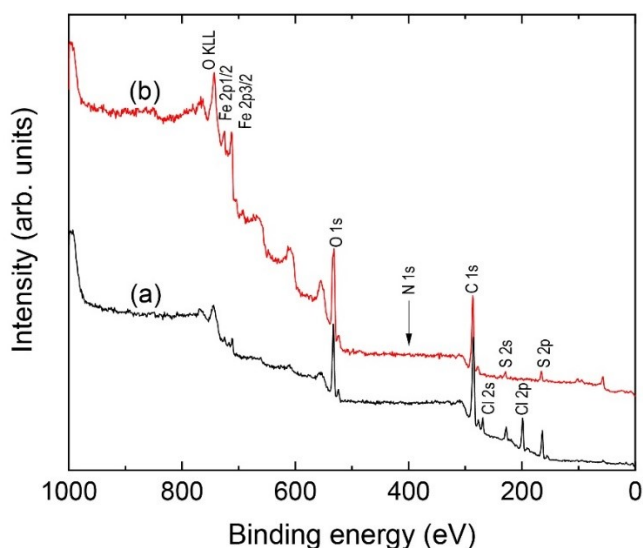

**Fig. S4** XPS survey spectra recorded for (a) P3MeOT-Cl and (b) Red 1.

#### EDX spectra of P3MeOT-Cl and Red 1

Fig. S5 shows the EDX spectra recorded for P3MeOT-Cl and Red 1, in addition to their corresponding SEM images. In the EDX spectra, if N were present, its N K $\alpha$  signal would be expected to appear at 0.39 keV, namely between the carbon (C K $\alpha$ : 0.28 keV) and oxygen (O K $\alpha$ : 0.53 keV) peaks.<sup>3,4</sup> However, since no signal corresponding to N was detected in either of the spectra, it was deduced that neither P3MeOT-Cl nor Red 1 contains nitrogen. This finding supports the results shown in Fig. S4.

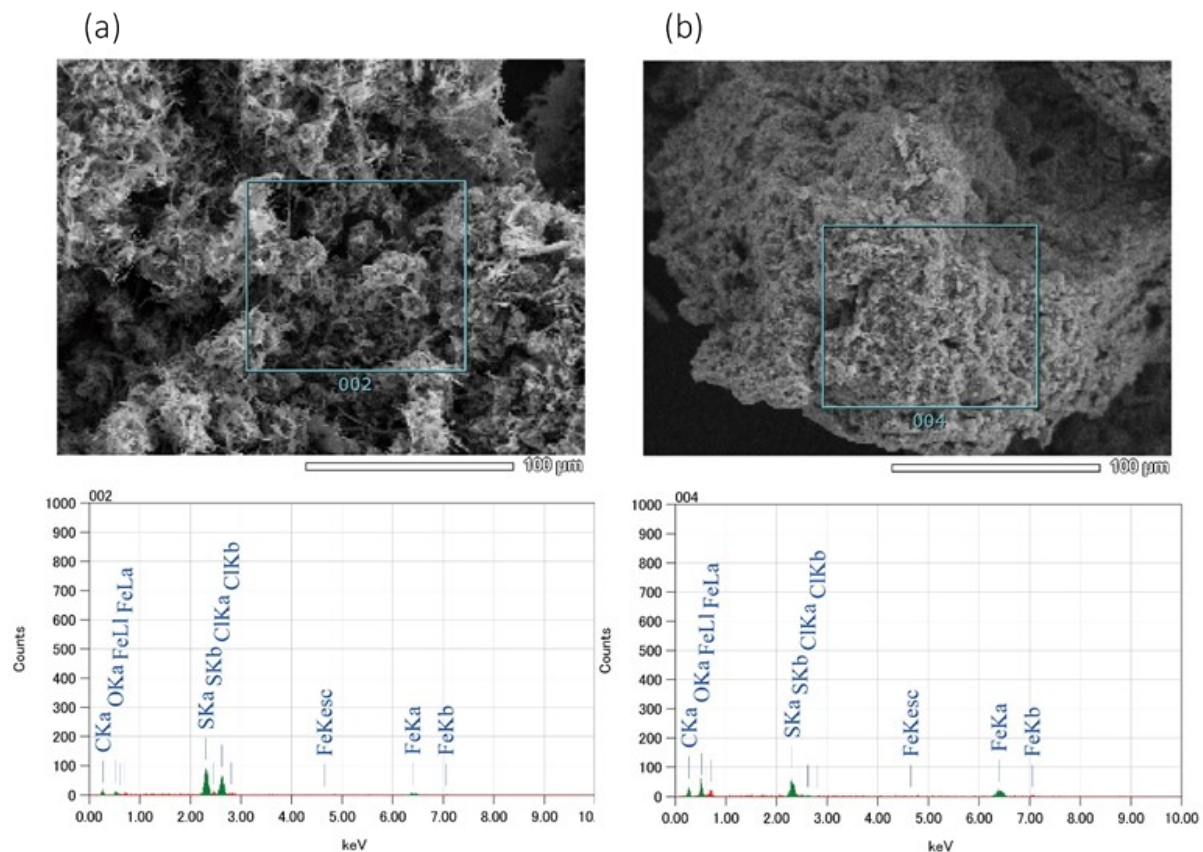

**Fig. S5** EDX spectra recorded for (a) P3MeOT-Cl and (b) Red 1. Above each spectrum, the corresponding SEM image is presented.

### Magnetic property measurements for Red 2

Fig. S6 shows the magnetic hysteresis loop of Red 2 measured at 5 K and its magnified view along the y-axis. The magnified hysteresis loop exhibits a saturation magnetization of 0.1 emu/g under a 50 kOe magnetic field, which is negligibly small compared to that of Red 1 (i.e., 20.2 emu/g under a 50 kOe magnetic field; see subsection 3.8 of the main text). A similar trend was observed at 300 K. Consequently, it was apparent that the development of magnetization in Red 1 is not attributable to the P3MeOT backbone, but rather to  $\text{Fe}_3\text{O}_4$ .

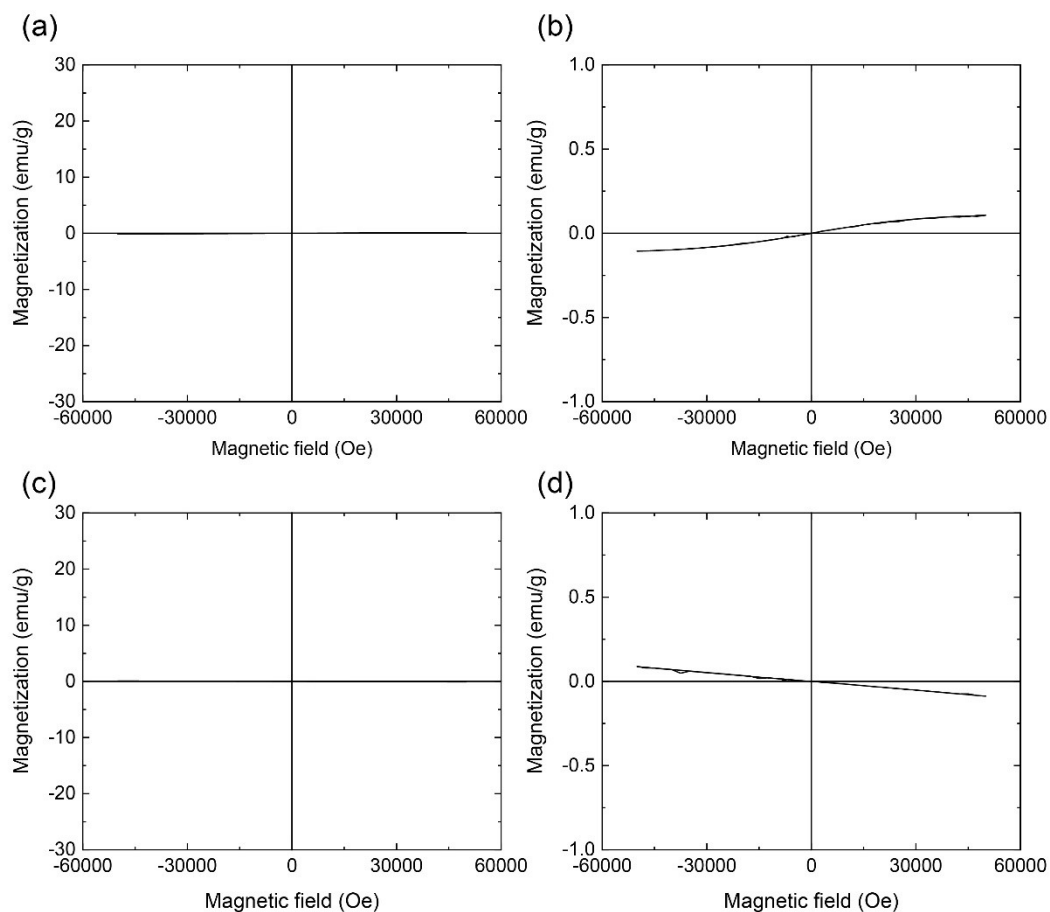

**Fig. S6** Magnetic hysteresis loops of Red 2 recorded at (a, b) 5 K and (c, d) 300 K. Panels (b) and (d) represent expanded views of the data presented in panels (a) and (c), respectively.

#### Magnetic property measurements for P3MeOT-ClO<sub>4</sub>

Fig. S7 shows the magnetic hysteresis loop of P3MeOT-ClO<sub>4</sub> measured at 5 K and its magnified view along the y-axis. The magnified hysteresis loop exhibits a saturation magnetization of 0.2 emu/g under a 50 kOe magnetic field, which is negligibly small compared to that of Red 1 (i.e., 20.2 emu/g under a 50 kOe magnetic field; see subsection 3.8 of the main text). A similar trend was observed at 300 K.

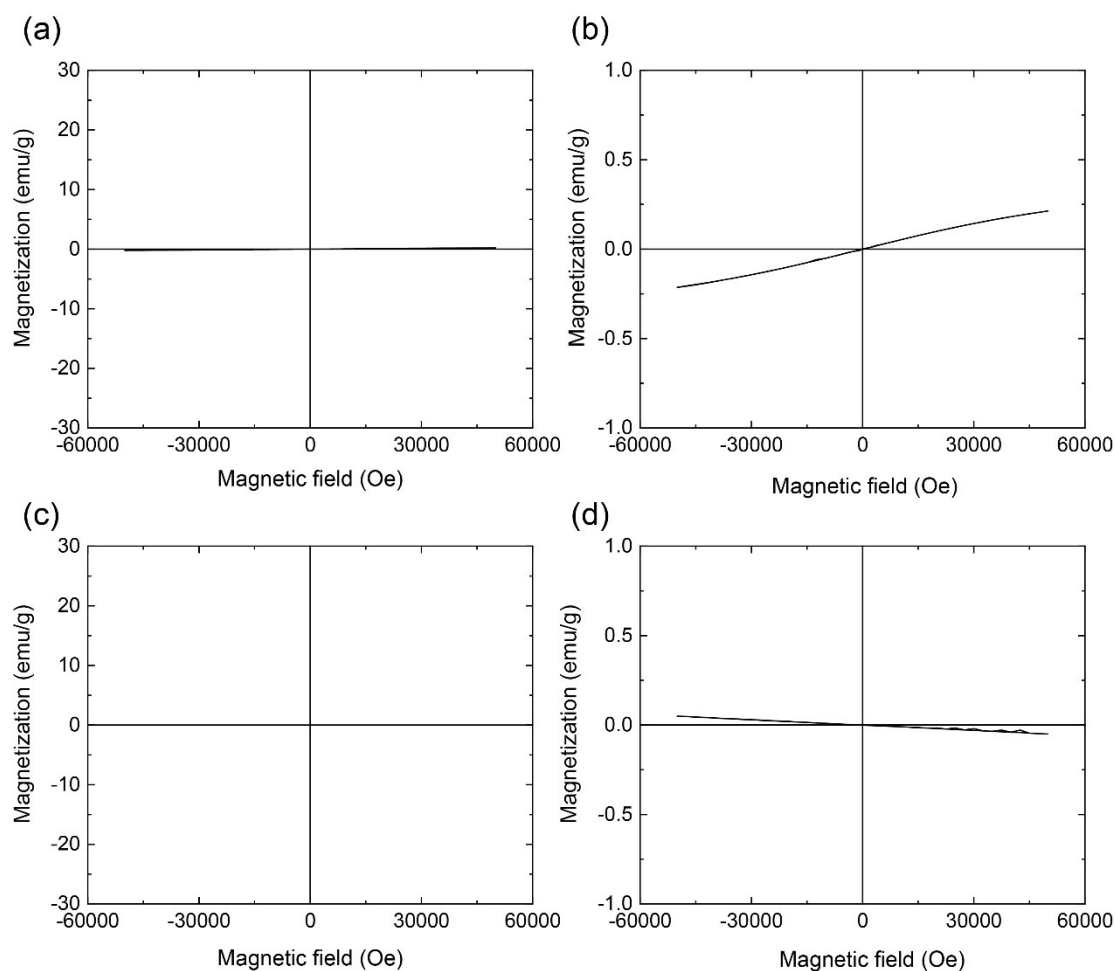

**Fig. S7** Magnetic hysteresis loops of P3MeOT-ClO<sub>4</sub> recorded at (a, b) 5 K and (c, d) 300 K. Panels (b) and (d) represent expanded views of the data presented in panels (a) and (c), respectively.

## Supplementary References

- 1 Supporting Information in: M. Tachiki, R. Tagawa and K. Hoshino, Oligo(3-methoxythiophene)s as Water-Soluble Dyes for Highly Lustrous Gold- and Bronze-Like Metal-Effect Coatings and Printings, *ACS Omega*, 2020, **5**, 24379–24388.
- 2 Y. Zhang, S. Mu, B. Deng, J. Zheng, Electrochemical Removal and Release of Perchlorate Using Poly(aniline-co-o-aminophenol), *J. Electroanal. Chem.*, 2010, **641**, 1–6.
- 3 Y. Ye, J. Chen, Q. Ding, D. Lin, R. Dong, L. Yang, J. Liu, Sea-Urchin-Like Fe<sub>3</sub>O<sub>4</sub>@C@Ag Particles: an Efficient SERS Substrate for Detection of Organic Pollutants, *Nanoscale*, 2013, **5**, 5887–5895.
- 4 D. Menga, F. Ruiz-Zepeda, L. Moriau, M. Šála, F. Wagner, B. Koyutürk, M. Bele, U. Petek, N. Hodnik, M. Gaberšček, T.-P. Feller, *Adv. Energy Mater.*, 2019, **9**, 1902412.
